# Supplementary material for: A directed co-assembly of herbal small molecules into carrier-free nanodrugs for enhanced synergistic antitumor efficacy
Source: Royal Society of Chemistry journal article supplement (doi:10.1039/d0tb02071k), 2020-12-10
Supplement: d0tb02071k1.pdf [file d0tb02071k1.pdf]

## Supporting Information

# **Directed co-assembly of herbal small molecules into carrier-free nanodrugs for enhanced synergistic antitumor efficacy**

Jiacheng Wang<sup>a</sup>, Wenshu Qiao<sup>a</sup>, Xu Li<sup>b</sup>, Haitian Zhao<sup>a</sup>, Hua Zhang<sup>a</sup>, Aijun Dong<sup>a</sup>, Xin Yang<sup>a\*</sup>

a. School of Chemistry and Chemical Engineering, Harbin Institute of Technology, No.92 West Dazhi

Street, Nan Gang District, Harbin, Heilongjiang, 150001, P.R.China

b. Department of Ophthalmology, the Second Hospital, Jilin University, No.4026 Yatai street, Nangan

District, Changchun, Jilin, 130041, P.R.China

**\*Corresponding Author:** yangxin@hit.edu.cn

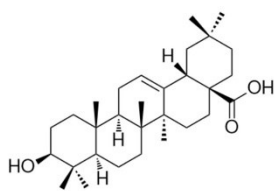

**Oleanolic acid**

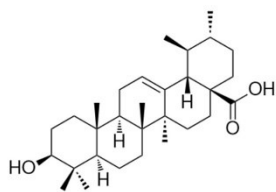

**Ursolic acid**

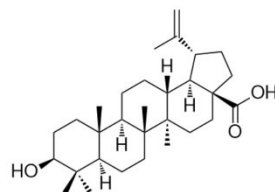

**Betulinic acid**

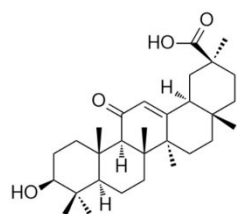

**Glycyrrhetic acid**

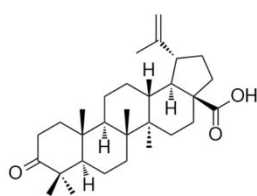

**Liquidambaric acid**

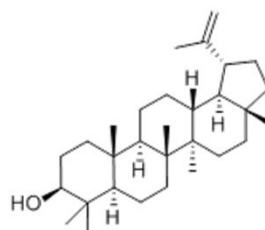

**Lupeol**

**Scheme S1.** Structural formula of of pentacyclic triterpenoids

---

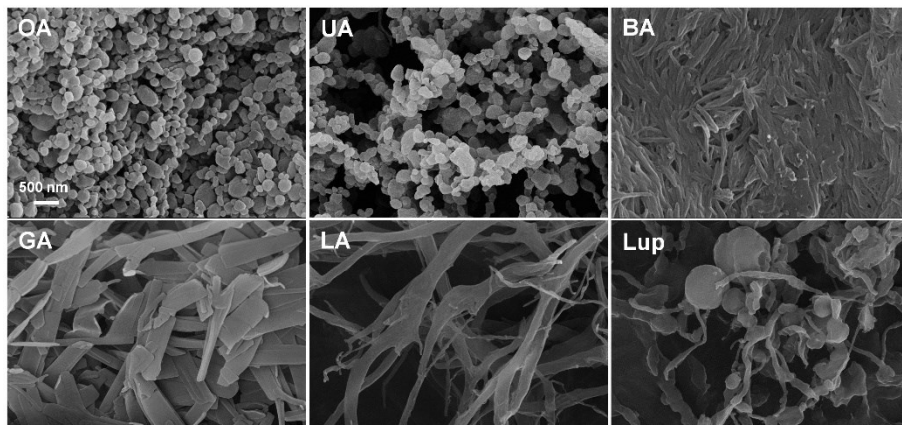

**Figure S1** SEM images of self-assembled nanoparticles of pentacyclic triterpenoids

---

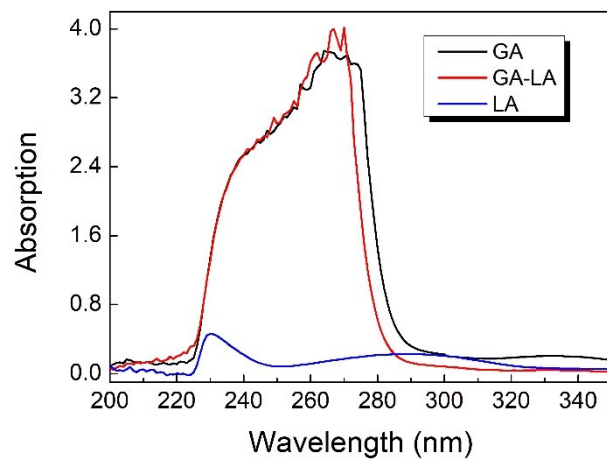

**Figure S2** Overlay of UV-visible spectrum of GA, LA and GA-LA

---

| Group           |          | Micro-morphology                                                                  | Molecular configurations                                                          | Molecular skeleton configuration                                                   | Hydrophobic surface                                                                 |
|-----------------|----------|-----------------------------------------------------------------------------------|-----------------------------------------------------------------------------------|------------------------------------------------------------------------------------|-------------------------------------------------------------------------------------|
| Co-assembly     | LA + Lup | 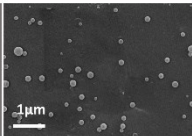 |  |  |  |
| Non-co-assembly | UA + LA  |  |  |  |  |

**Figure S3** Analysis of molecular dynamics simulation results. Cluster analysis of co-assembled and non-co-assembled NPs. Two molecules in the co-assembled nanoparticles form a parallel plane space configuration, while the two molecules in the non-co-assembled nanoparticles form a spatial configuration. Red circle represents hydrophilic chain; yellow circle represents hydrophobic chain

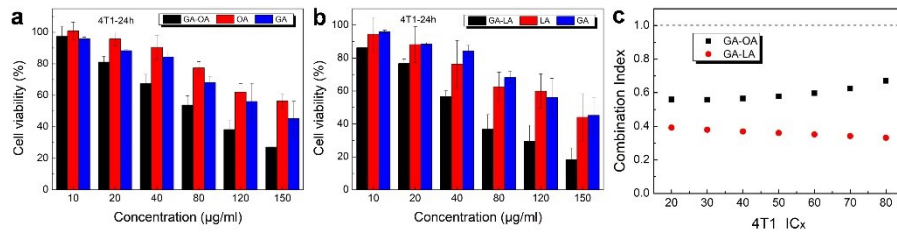

**Figure S4** Cytotoxicity evaluation of GA-OA and GA-LA NPs. **a.b** The growth inhibitory effects of GA-OA and GA-LA NPs on 4T1 cells for 24h **c.** Combination index (CI) of GA-OA and GA-LA on 4T1 cells. All of the CI values of GA-OA and GA-LA NPs are less than 1.0 indicate synergy

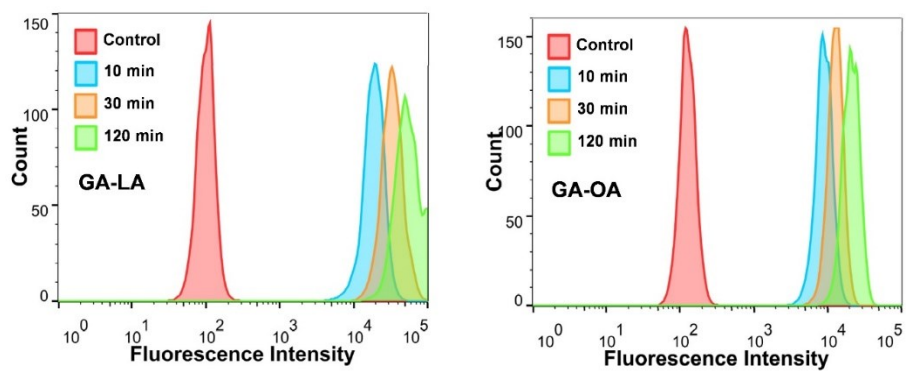

**Figure S5** Cellular uptake capability of NPs in MCF-7 cells. Flow cytometry analysis of cell phagocytosis of GA-LA and GA-OA NPs

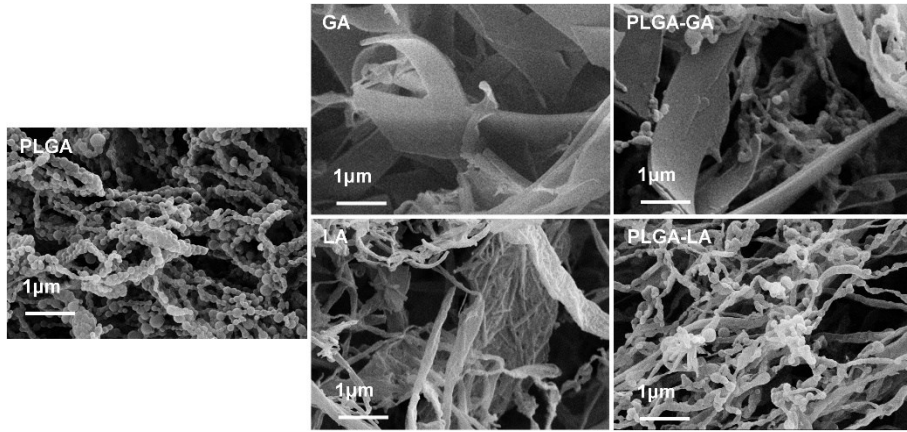

**Figure S6** SEM images of SEM images of PLGA loading GA and PLGA loading LA

---



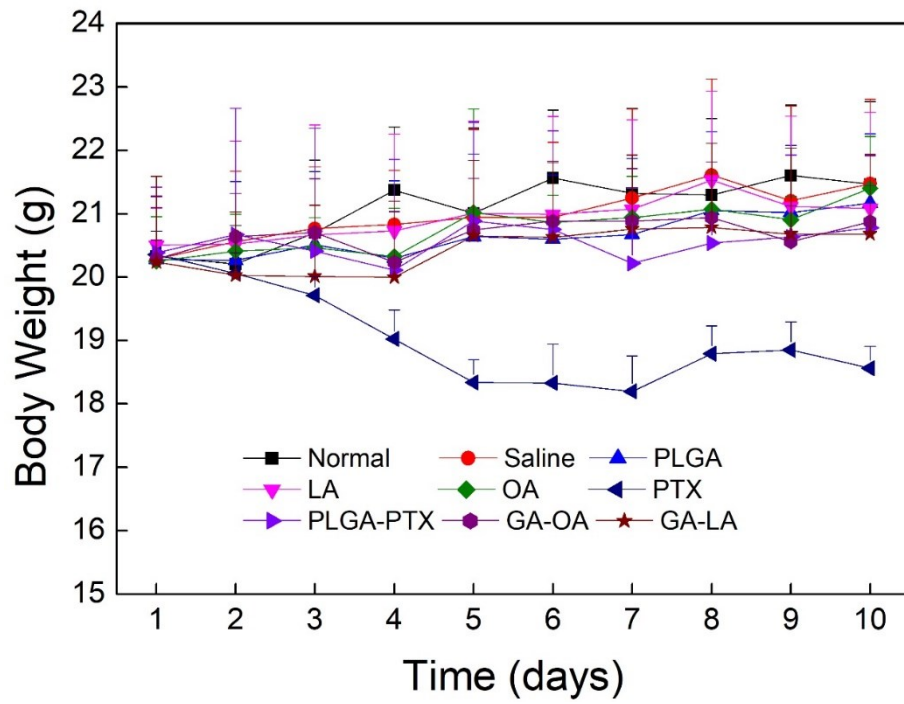

Figure S7 The weight change of the mice during the treatment with various drug formulations

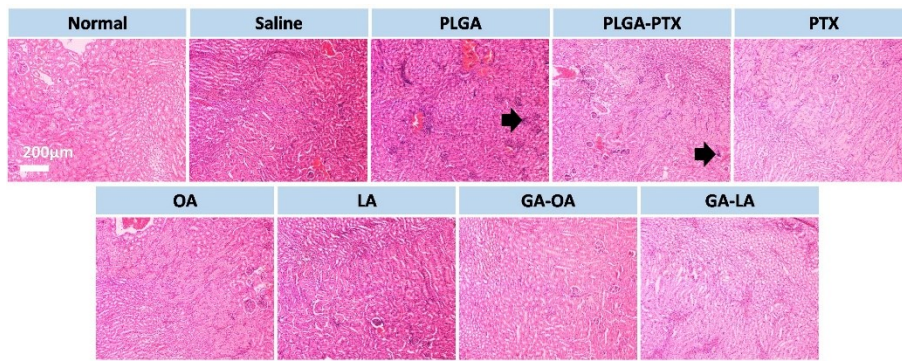

**Figure S8** Representative images of H&E-stained sections of kidneys (Black arrows represent inflammatory cell infiltration)

---

| Formula Abbreviation | Diameter (nm) | PDI         | Zeta potential (mV) |
|----------------------|---------------|-------------|---------------------|
| OA                   | 233 ± 2       | 0.05 ± 0.03 | -20.5 ± 1.6         |
| UA                   | 275 ± 5       | 0.05 ± 0.01 | -21.3 ± 1.2         |
| BA                   | 1811 ± 280    | 0.81 ± 0.11 | -13.3 ± 0.4         |
| GA                   | 543 ± 26      | 0.32 ± 0.06 | -12.9 ± 1.1         |
| LA                   | 878 ± 18      | 0.43 ± 0.11 | -8.1 ± 0.9          |
| Lup                  | 334 ± 22      | 0.32±0.11   | -11.4 ± 1.4         |

**Table S1** Particle size, polydispersity index (PDI) and *Zeta* potentials of self-assembly NPs measured by DLS

---

| Formula Abbreviation | Diameter (nm) | PDI         | Zeta potential (Mv) |
|----------------------|---------------|-------------|---------------------|
| OA-BA                | 341 ± 18      | 0.20 ± 0.04 | -15.6 ± 0.7         |
| GA-LA                | 228 ± 10      | 0.03 ± 0.02 | -16.5 ± 1.3         |
| LA-Lup               | 265 ± 3       | 0.12 ± 0.03 | -9.3 ± 0.6          |
| GA-OA                | 172±12        | 0.05±0.03   | -22.5±1.8           |

**Table S2** Particle size, polydispersity index (PDI) and *Zeta* potentials of co-assembly NPs measured by DLS

---

| Group   | Cell cycle distribution (%) |       |       |
|---------|-----------------------------|-------|-------|
|         | G0-G1                       | S     | G2-M  |
| Control | 37.84                       | 56.68 | 5.49  |
| OA      | 8.58                        | 59.3  | 32.12 |
| GA      | 27.54                       | 55.3  | 17.16 |
| LA      | 23.23                       | 72.59 | 4.18  |
| GA-OA   | 7.9                         | 58.06 | 34.04 |
| GA-LA   | 22.96                       | 62.37 | 14.68 |

**Table S3.** Cell cycle distribution was detected by flow cytometry

---

| Tumor tissue (Average fluorescence intensity) |       |       |       |      |      |      |
|-----------------------------------------------|-------|-------|-------|------|------|------|
| Time (h)                                      | 1     | 2     | 4     | 8    | 12   | 24   |
| GA-OA                                         | 14990 | 14283 | 11678 | 7044 | 5099 | 1862 |
| GA-LA                                         | 17290 | 15579 | 11718 | 8005 | 5133 | 1897 |

**Table S4.** Fluorescence intensity of tumor tissue at different time

---

| Group | Main tissues (Average fluorescence intensity) |       |        |       |        |       |
|-------|-----------------------------------------------|-------|--------|-------|--------|-------|
|       | Heart                                         | Liver | Spleen | Lung  | Kidney | Tumor |
| GA-OA | 84.1                                          | 479.1 | 156.6  | 183.2 | 653.8  | 476.5 |
| GA-LA | 139.8                                         | 391.2 | 161.3  | 172.6 | 468.0  | 675.6 |

**Table S5.** The fluorescence intensity of main tissues at 24 hours after injection

---
